# Supplementary material for: A novel family of 3D photoluminescent lanthanide–bta–flexible MOFs constructed from 1,2,4,5-benzenetetracarboxylic acid and different spanning of dicarboxylate acid ligands
Source: Royal Society of Chemistry journal article supplement (doi:10.1039/c0ce00707b), 2011-01-01
Supplement: c0ce00707b.pdf [file c0ce00707b.pdf]

# A Novel Family of 3D Photoluminescent Lanthanide–Bta–Flexible MOFs Constructed from 1,2,4,5-Benzenetetracarboxylic Acid and Different Spanning of Dicarboxylate Acid Ligands

Ke-Ling Hou<sup>1</sup>, Feng-Ying Bai<sup>1</sup>, Yong-Heng Xing<sup>1\*</sup>, Jian-Ling Wang<sup>1</sup>, Zhan Shi<sup>2</sup>

<sup>1</sup>College of Chemistry and Chemical Engineering, Liaoning Normal University,

Dalian 116029, P. R. China

<sup>2</sup>State Key Laboratory of Inorganic Synthesis and Preparative Chemistry, College of  
Chemistry, Jilin University, Changchun 130012, P.R. China

\*Corresponding author: E-mail: yhxing2000@yahoo.com

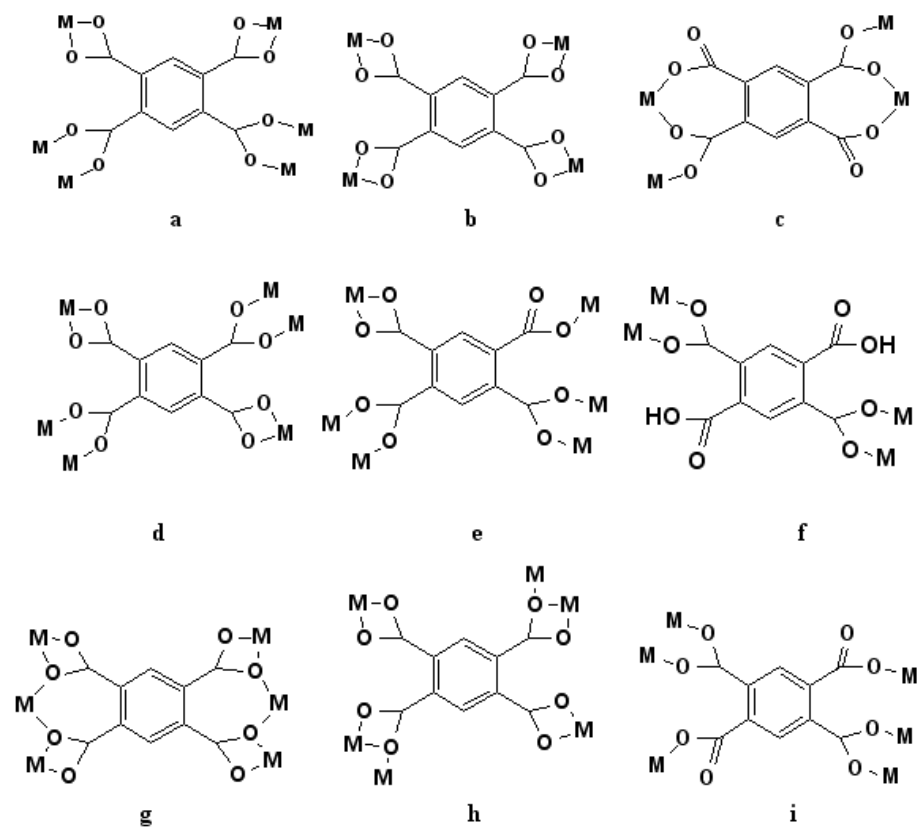

**Scheme 1** The variety of coordination modes of 1,2,4, 5-benzenetetracarboxylic acid ligand coordinated to metals in the coordination polymer.

**Text:**

The Synthesis of complexes **2–4**, **6–8** and **10–12**.

**[Tb<sub>2</sub>(ox)(bta)(H<sub>2</sub>O)<sub>4</sub>] (2)** The compound was obtained by following a procedure similar to that used for **1** except that EuCl<sub>3</sub>·6H<sub>2</sub>O was replaced by TbCl<sub>3</sub>·6H<sub>2</sub>O (0.22 g 0.59 mmol). Colorless block single crystals for **2** were obtained in ca. 67.60 % yield (based on Tb). Anal. Calcd for **C<sub>12</sub>H<sub>10</sub>O<sub>16</sub>Tb<sub>2</sub> (728.04)**: Tb, 43.66; C, 19.78; H, 1.37 %. Found: Tb, 43.62; C, 19.83; H, 1.41 %. IR data (KBr pellet, ν[cm<sup>-1</sup>]): 3328(s), 1686(m), 1581(s), 1485(w), 1434(w), 1397(s), 1324(m), 1142(w), 921(m), 873(m), 826(m), 800(w), 712(m), 573(m), 519(w), 438(m), 383(w).

**[Dy<sub>2</sub>(ox)(bta)(H<sub>2</sub>O)<sub>4</sub>] (3)** The complex was obtained by following a procedure similar to that used for **1** except that EuCl<sub>3</sub>·6H<sub>2</sub>O was replaced by DyCl<sub>3</sub>·6H<sub>2</sub>O (0.22 g 0.58 mmol). Primrose yellow block crystals for **3** were obtained in ca. 66.84 % yield (based on Dy). Anal. Calcd for **C<sub>12</sub>H<sub>10</sub>O<sub>16</sub>Dy<sub>2</sub> (735.20)**: Dy, 44.21; C, 19.59; H, 1.36 %. Found: Dy, 44.18; C, 19.65; H, 1.32 %. IR data (KBr pellet, ν[cm<sup>-1</sup>]): 3341(s), 1687(m), 1583(s), 1487(w), 1435(w), 1397(s), 1325(m), 1142(w), 921(m), 873(m), 826(m), 799(w), 712(m), 572(m), 517(w), 437(m), 382(w).

**[Ho<sub>2</sub>(ox)(bta)(H<sub>2</sub>O)<sub>4</sub>] (4)** The synthesis procedure was prepared by a method similar to that used for **1** except that EuCl<sub>3</sub>·6H<sub>2</sub>O was replaced by HoCl<sub>3</sub>·6H<sub>2</sub>O (0.22 g 0.58 mmol). Rosiness block single crystals for **4** were obtained in ca. 64.56 % yield (based on Ho). Anal. Calcd for **C<sub>12</sub>H<sub>10</sub>O<sub>16</sub>Ho<sub>2</sub> (740.06)**: Ho, 44.57; C, 19.46; H, 1.35 %. Found: Ho, 44.52; C, 19.52; H, 1.31 %. IR data (KBr pellet, ν[cm<sup>-1</sup>]): 3343(s), 1688(m), 1585(s), 1487(w), 1431(w), 1398(s), 1325(m), 1142(w), 921(m), 874(m), 827(m), 798(w), 713(m), 575(m), 517(w), 437(m), 382(w).

**[Eu<sub>2</sub>(glu)(bta)(H<sub>2</sub>O)<sub>4</sub>]·(H<sub>2</sub>O) (6)** The complex was prepared by a method similar to that used for complex **5** but changing the TbCl<sub>3</sub>·6H<sub>2</sub>O to EuCl<sub>3</sub>·6H<sub>2</sub>O (0.22 g, 0.60 mmol). Colorless prismatic single crystals of **6** were obtained in ca. 74.68 % yield (based on Eu). Anal. Calcd for **C<sub>15</sub>H<sub>18</sub>O<sub>17</sub>Eu<sub>2</sub> (774.21)**: Eu, 39.25; C, 23.25; H, 2.32 %. Found: Eu, 39.28; C, 23.32; H, 2.38 %. IR data (KBr pellet, ν[cm<sup>-1</sup>]): 3447(s), 2964(w), 1556(s), 1383(s), 1310(m), 1068(m), 946(m), 873(m), 823(m), 779(w), 647(w), 579(m), 510(m), 457(m), 402(w).

**[Dy<sub>2</sub>(glu)(bta)(H<sub>2</sub>O)<sub>4</sub>]·(H<sub>2</sub>O) (7)** The complex was prepared by a method similar to that used for complex **5** but changing the TbCl<sub>3</sub>·6H<sub>2</sub>O to DyCl<sub>3</sub>·6H<sub>2</sub>O (0.22 g, 0.58 mmol), primrose yellow prismatic single crystals of **7** were obtained in ca. 77.25 % yield (based on Dy). Anal. Calcd for **C<sub>15</sub>H<sub>18</sub>O<sub>17</sub>Dy<sub>2</sub> (795.29)**: Dy, 40.87; C, 22.63; H, 2.26 %. Found: Dy, 40.83; C, 22.71; H, 2.22 %. IR data (KBr pellet, ν[cm<sup>-1</sup>]): 3447(s), 2965(w), 1559(s), 1383(s), 1310(m), 1068(m), 949(m), 876(m), 825(m), 780(w), 649(w), 580(m), 510(m), 458(m), 404(w).

**[Ho<sub>2</sub>(glu)(bta)(H<sub>2</sub>O)<sub>4</sub>]·(H<sub>2</sub>O) (8)** The synthesis procedure was similar to that used for complex **5** except that TbCl<sub>3</sub>·6H<sub>2</sub>O was replaced by HoCl<sub>3</sub>·6H<sub>2</sub>O (0.22 g, 0.58 mmol). Rosiness prismatic single crystals of **8** were obtained in ca. 79.24 % yield (based on Ho). Anal. Calcd for **C<sub>15</sub>H<sub>18</sub>O<sub>17</sub>Ho<sub>2</sub> (800.15)**: Ho, 41.22 ; C, 22.50; H, 2.25 %. Found: Ho, 41.27 ; C, 22.44; H, 2.28 %. IR data (KBr pellet, ν[cm<sup>-1</sup>]): 3447(s), 2967(w), 1560(s), 1385(s), 1310(m), 1068(m), 949(m), 877(m), 826(m), 777(w), 650(w), 580(m), 511(m), 459(m), 405(w).

**[Eu<sub>2</sub>(ad)(bta)(H<sub>2</sub>O)<sub>2</sub>] (10)** The synthesis procedure was similar to that used for **9** except that TbCl<sub>3</sub>·6H<sub>2</sub>O was replaced by EuCl<sub>3</sub>·6H<sub>2</sub>O (0.22 g, 0.60 mmol). Spicule colorless single crystals for **10** were obtained in ca. 69.83 % yield (based on Eu). Anal. Calcd for **C<sub>16</sub>H<sub>14</sub>O<sub>14</sub>Eu<sub>2</sub> (734.19)**: Eu, 41.40; C, 26.15; H, 1.91 %. Found: Eu, 41.36; C, 26.23; H, 1.94 %. IR data (KBr pellet, ν[cm<sup>-1</sup>]): 3449(s), 2964(w), 2922(w), 1565(s), 1496(m), 1431(w), 1386(s), 1148(m), 943(w), 882(m), 835(m), 779(m), 623(w) 588(m), 522(m), 370(w).

**[Dy<sub>2</sub>(ad)(bta)(H<sub>2</sub>O)<sub>2</sub>] (11)** The synthesis procedure was similar to that used for **9** except that TbCl<sub>3</sub>·6H<sub>2</sub>O was replaced by DyCl<sub>3</sub>·6H<sub>2</sub>O (0.22 g, 0.58 mmol). Spicule colorless single crystals for **11** were obtained in ca. 64.25 % yield (based on Dy). Anal. Calcd for **C<sub>16</sub>H<sub>14</sub>O<sub>14</sub>Dy<sub>2</sub> (755.27)**: Dy, 43.03; C, 26.48; H, 1.85 %. Found: Dy, 43.08; C, 26.39; H, 1.89 %. IR data (KBr pellet, ν[cm<sup>-1</sup>]): 3459(s), 2963(w), 2922(w), 1572(s), 1496(m), 1427(w), 1386(s), 1149(m), 943(w), 885(m), 836(m), 780(m), 625(w), 588(m), 522(m), 373(w).

**[Er(ad)<sub>0.5</sub>(bta)<sub>0.5</sub>(H<sub>2</sub>O)] (12)** The synthesis procedure was similar to that used for **9** except that the TbCl<sub>3</sub>·6H<sub>2</sub>O was replaced by ErCl<sub>3</sub>·6H<sub>2</sub>O (0.22 g 0.58 mmol). Spicule Pink single crystals for **12** were obtained in ca. 62.88 % yield (based on Er). Anal. Calcd for **C<sub>8</sub>H<sub>7</sub>O<sub>7</sub>Er**

(382.40): Er, 43.74; C, 25.10; H, 1.83 %. Found: Er, 43.70; C, 25.22; H, 1.78 %. IR data (KBr pellet,  $\nu[\text{cm}^{-1}]$ ): 3445(s), 2963(w), 2923(w), 1576(s), 1497(m), 1427(w), 1386(s), 1148(m), 943(w), 886(m), 837(m), 780(m), 626(w) 588(m), 521(m), 373(w).

**Table S1** The selected bond angles (deg) of Complex **1**, **5** and **9**\*

| Complex 1                |            |                          |            |                          |            |
|--------------------------|------------|--------------------------|------------|--------------------------|------------|
| O1–Eu–O4 <sup>#2</sup>   | 144.40(8)  | O1–Eu–O2W                | 141.36(9)  | O4 <sup>#2</sup> –Eu–O2W | 70.70(8)   |
| O1–Eu–O5                 | 87.33(8)   | O4 <sup>#2</sup> –Eu–O5  | 88.74(9)   | O2W–Eu–O5                | 75.63(9)   |
| O1–Eu–O1W                | 71.29(9)   | O4 <sup>#2</sup> –Eu–O1W | 140.92(8)  | O2W–Eu–O1W               | 70.89(9)   |
| O5–Eu–O1W                | 75.05(9)   | O1–Eu–O2 <sup>#3</sup>   | 105.90(8)  | O2W–Eu–O2 <sup>#3</sup>  | 72.54(9)   |
| O5–Eu–O2 <sup>#3</sup>   | 142.76(7)  | O1W–Eu–O2 <sup>#3</sup>  | 76.64(9)   | O1–Eu–O6                 | 74.79(8)   |
| O4 <sup>#2</sup> –Eu–O6  | 71.20(8)   | O2W–Eu–O6                | 125.96(9)  | O5–Eu–O6                 | 66.67(8)   |
| O1W–Eu–O6                | 129.25(8)  | O2 <sup>#3</sup> –Eu–O6  | 150.01(8)  | O1–Eu–O3 <sup>#4</sup>   | 76.44(8)   |
| O2W–Eu–O3 <sup>#4</sup>  | 135.40(8)  | O5–Eu–O3 <sup>#4</sup>   | 143.04(7)  | O1W–Eu–O3 <sup>#4</sup>  | 127.80(9)  |
| O6–Eu–O3 <sup>#4</sup>   | 77.03(7)   |                          |            |                          |            |
| Complex 5                |            |                          |            |                          |            |
| O3 <sup>#1</sup> –Tb–O5  | 78.47(10)  | O6 <sup>#1</sup> –Tb–O5  | 135.04(11) | O4 <sup>#2</sup> –Tb–O5  | 77.73(10)  |
| O3 <sup>#1</sup> –Tb–O1W | 71.28(10)  | O6 <sup>#1</sup> –Tb–O1W | 69.24(10)  | O4 <sup>#2</sup> –Tb–O1W | 80.01(10)  |
| O5–Tb–O1W                | 145.63(10) | O3 <sup>#1</sup> –Tb–O2  | 144.58(10) | O6 <sup>#1</sup> –Tb–O2  | 75.01(10)  |
| O4 <sup>#2</sup> –Tb–O2  | 123.80(10) | O5–Tb–O2                 | 79.21(9)   | O1W–Tb–O2                | 135.15(10) |
| O5–Tb–O2 <sup>#1</sup>   | 67.53(10)  | O1W–Tb–O2 <sup>#1</sup>  | 115.96(10) | O2–Tb–O2 <sup>#1</sup>   | 74.27(10)  |
| O3 <sup>#1</sup> –Tb–O2W | 136.47(11) | O6 <sup>#1</sup> –Tb–O2W | 70.84(11)  | O4 <sup>#2</sup> –Tb–O2W | 86.40(11)  |
| O5–Tb–O2W                | 137.08(10) | O1W–Tb–O2W               | 66.23(11)  | O2–Tb–O2W                | 77.18(10)  |
| O2 <sup>#1</sup> –Tb–O2W | 136.36(10) | O3 <sup>#1</sup> –Tb–O1  | 139.71(10) | O6 <sup>#1</sup> –Tb–O1  | 117.19(10) |
| O4 <sup>#2</sup> –Tb–O1  | 72.04(10)  | O5–Tb–O1                 | 70.10(10)  | O1W–Tb–O1                | 126.30(10) |
| O2–Tb–O1                 | 51.97(9)   | O2 <sup>#1</sup> –Tb–O1  | 115.78(10) | O2W–Tb–O1                | 67.09(11)  |
| Complex 9                |            |                          |            |                          |            |
| O6 <sup>#1</sup> –Tb–O5  | 143.16(9)  | O2 <sup>#1</sup> –Tb–O5  | 70.90(9)   | O4 <sup>#2</sup> –Tb–O5  | 78.17(9)   |
| O6 <sup>#1</sup> –Tb–O1W | 73.56(12)  | O2 <sup>#1</sup> –Tb–O1W | 132.27(11) | O4 <sup>#2</sup> –Tb–O1W | 78.21(11)  |
| O5–Tb–O1W                | 138.11(11) | O6 <sup>#1</sup> –Tb–O1  | 134.24(10) | O2 <sup>#1</sup> –Tb–O1  | 140.89(9)  |
| O4 <sup>#2</sup> –Tb–O1  | 120.01(8)  | O5–Tb–O1                 | 76.08(9)   | O1W–Tb–O1                | 86.62(11)  |
| O6 <sup>#1</sup> –Tb–O4  | 90.84(8)   | O2 <sup>#1</sup> –Tb–O4  | 71.45(8)   | O4 <sup>#2</sup> –Tb–O4  | 139.76(4)  |
| O5–Tb–O4                 | 72.86(8)   | O1W–Tb–O4                | 141.21(11) | O1–Tb–O4                 | 79.33(8)   |
| O6 <sup>#1</sup> –Tb–O2  | 137.35(9)  | O2 <sup>#1</sup> –Tb–O2  | 133.68(6)  | O4 <sup>#2</sup> –Tb–O2  | 69.80(8)   |
| O5–Tb–O2                 | 75.22(8)   | O1W–Tb–O2                | 64.31(11)  | O1–Tb–O2                 | 51.59(8)   |
| O4–Tb–O2                 | 126.36(8)  | O6 <sup>#1</sup> –Tb–O3  | 72.55(9)   | O2 <sup>#1</sup> –Tb–O3  | 110.27(8)  |
| O4 <sup>#2</sup> –Tb–O3  | 165.89(8)  | O5–Tb–O3                 | 115.95(8)  | O1W–Tb–O3                | 90.24(12)  |
| O1–Tb–O3                 | 66.61(8)   | O4–Tb–O3                 | 50.99(8)   | O2–Tb–O3                 | 112.57(8)  |

\*Symmetry transformations used to generate equivalent atoms:

#2: x, y, z-1; #3: -x+2, -y+1, -z+1; #4: -x+1, -y+1, -z+1 for **1**. #1 -x+1/2, -y+1/2, -z+1; #2 x, -y+1, z-1/2 for **5**. #1: -x+3/2, y+1/2, -z+1/2; #2 -x+3/2, y-1/2, -z+1/2 for **9**.

**Table S2** Selected bond distances (Å) and angles (deg) of complex **2**\*

| Bond Distances           |            |                          |            |                          |            |
|--------------------------|------------|--------------------------|------------|--------------------------|------------|
| Tb–O1                    | 2.433(3)   | Tb–O2 <sup>#2</sup>      | 2.329(3)   | Tb–O3 <sup>#3</sup>      | 2.409(3)   |
| Tb–O4 <sup>#1</sup>      | 2.328(3)   | Tb–O5                    | 2.365(3)   | Tb–O6                    | 2.421(3)   |
| Tb–O1W                   | 2.361(3)   | Tb–O2W                   | 2.408(3)   |                          |            |
| Bond Angles              |            |                          |            |                          |            |
| O4 <sup>#1</sup> –Tb–O1W | 141.42(11) | O2 <sup>#2</sup> –Tb–O1W | 70.97(11)  | O4 <sup>#1</sup> –Tb–O5  | 87.78(12)  |
| O2 <sup>#2</sup> –Tb–O5  | 89.62(12)  | O1W–Tb–O5                | 75.46(12)  | O4 <sup>#1</sup> –Tb–O2W | 71.38(11)  |
| O2 <sup>#2</sup> –Tb–O2W | 141.30(11) | O1W–Tb–O2W               | 70.82(11)  | O5–Tb–O2W                | 75.19(11)  |
| O1W–Tb–O3 <sup>#3</sup>  | 72.64(12)  | O5–Tb–O3 <sup>#3</sup>   | 142.70(10) | O2W–Tb–O3 <sup>#3</sup>  | 76.47(11)  |
| O4 <sup>#1</sup> –Tb–O6  | 74.84(11)  | O2 <sup>#2</sup> –Tb–O6  | 71.60(12)  | O1W–Tb–O6                | 126.44(12) |
| O5–Tb–O6                 | 67.41(10)  | O2W–Tb–O6                | 129.80(11) | O3 <sup>#3</sup> –Tb–O6  | 149.35(10) |
| O4 <sup>#1</sup> –Tb–O1  | 76.34(10)  | O2 <sup>#2</sup> –Tb–O1  | 85.07(10)  | O1W–Tb–O1                | 135.29(11) |
| O5–Tb–O1                 | 143.26(10) | O2W–Tb–O1                | 127.75(11) | O3 <sup>#3</sup> –Tb–O1  | 74.01(10)  |
| O6–Tb–O1                 | 76.45(10)  |                          |            |                          |            |

\*Symmetry transformations used to generate equivalent atoms:

#1: x, y-1, z; #2: -x+1, -y+1, -z+1; #3: -x+2, -y+2, -z+2 for **2**.

**Table S3** Selected bond distances (Å) and angles (deg) of complex **3**\*

| Bond Distances            |            |                          |            |                          |            |
|---------------------------|------------|--------------------------|------------|--------------------------|------------|
| Dy–O2 <sup>#1</sup>       | 2.306(4)   | Dy–O4 <sup>#2</sup>      | 2.310(5)   | Dy–O5                    | 2.364(5)   |
| Dy–O2W                    | 2.357(5)   | Dy–O1W                   | 2.389(5)   | Dy–O1                    | 2.396(4)   |
| Dy–O6 <sup>#3</sup>       | 2.412(4)   | Dy–O3 <sup>#4</sup>      | 2.424(4)   |                          |            |
| Bond Angles               |            |                          |            |                          |            |
| O2 <sup>#1</sup> –Dy–O2W  | 141.51(18) | O4 <sup>#2</sup> –Dy–O2W | 70.65(17)  | O2 <sup>#1</sup> –Dy–O5  | 87.96(17)  |
| O4 <sup>#2</sup> –Dy–O5   | 90.34(17)  | O2W–Dy–O5                | 75.31(18)  | O2 <sup>#1</sup> –Dy–O1W | 70.81(18)  |
| O4 <sup>#2</sup> –Dy–O1W  | 141.70(17) | O2W–Dy–O1W               | 71.44(17)  | O2 <sup>#1</sup> –Dy–O6  | 75.19(16)  |
| O4 <sup>#2</sup> –Dy–O(6) | 71.94(17)  | O2 <sup>#1</sup> –Dy–O3  | 76.18(16)  | O5–Dy–O1W                | 74.96(17)  |
| O2 <sup>#1</sup> –Dy–O1)  | 104.89(15) | O4 <sup>#2</sup> –Dy–O1  | 97.42(16)  | O2W–Dy–O1                | 73.03(17)  |
| O5–Dy–O1                  | 142.61(16) | O1W–Dy–O1                | 76.51(17)  | O2W–Dy–O6 <sup>#3</sup>  | 126.35(17) |
| O5–Dy–O6 <sup>#3</sup>    | 67.87(15)  | O1W–Dy–O6 <sup>#3</sup>  | 129.76(17) | O1–Dy–O6 <sup>#3</sup>   | 149.05(16) |
| O2W–Dy–O3 <sup>#4</sup>   | 135.37(16) | O5–Dy–O3 <sup>#4</sup>   | 143.36(15) | O1W–Dy–O3 <sup>#4</sup>  | 127.50(16) |
| O1–Dy–O3 <sup>#4</sup>    | 73.96(16)  |                          |            |                          |            |

\*Symmetry transformations used to generate equivalent atoms:

#1 -x+1, -y+1, -z+1 ; #2 x-1, y-1, z-1 ; #3 -x, -y, -z ; #4 -x+1, -y+2, -z+1 for **3**.

**Table S4** Selected bond distances (Å) and angles (deg) of complex **4**\*

| Bond Distances           |            |                          |            |                          |            |
|--------------------------|------------|--------------------------|------------|--------------------------|------------|
| Ho–O2 <sup>#1</sup>      | 2.300(3)   | Ho–O3 <sup>#2</sup>      | 2.304(3)   | Ho–O2W                   | 2.341(3)   |
| Ho–O6                    | 2.351(3)   | Ho–O1 <sup>#3</sup>      | 2.382(3)   | Ho–O1W                   | 2.387(3)   |
| Ho–O5                    | 2.404(3)   | Ho–O4                    | 2.417(3)   |                          |            |
| Bond Angles              |            |                          |            |                          |            |
| O2 <sup>#1</sup> –Ho–O2W | 141.87(12) | O3 <sup>#2</sup> –Ho–O2W | 70.80(12)  | O2 <sup>#1</sup> –Ho–O6  | 88.04(12)  |
| O3 <sup>#2</sup> –Ho–O6  | 90.75(13)  | O2W–Ho–O6                | 75.55(13)  | O2W–Ho–O1 <sup>#3</sup>  | 73.18(13)  |
| O6–Ho–O1 <sup>#3</sup>   | 142.98(11) | O2 <sup>#1</sup> –Ho–O1W | 71.13(12)  | O3 <sup>#2</sup> –Ho–O1W | 141.89(11) |
| O2W–Ho–O1W               | 71.44(12)  | O6–Ho–O1W                | 75.02(12)  | O1 <sup>#3</sup> –Ho–O1W | 76.62(12)  |
| O2 <sup>#1</sup> –Ho–O5  | 74.90(12)  | O3 <sup>#2</sup> –Ho–O5  | 72.13(12)  | O2W–Ho–O5                | 126.56(13) |
| O6–Ho–O5                 | 67.85(11)  | O1 <sup>#3</sup> –Ho–O5  | 148.75(11) | O1W–Ho–O5                | 129.78(12) |
| O2 <sup>#1</sup> –Ho–O4  | 76.21(11)  | O3 <sup>#2</sup> –Ho–O4  | 84.36(11)  | O2W–Ho–O4                | 134.83(11) |
| O6–Ho–O4                 | 143.65(11) | O1 <sup>#3</sup> –Ho–O4  | 73.30(11)  | O1W–Ho–O4                | 127.45(11) |
| O5–Ho–O4                 | 76.41(10)  |                          |            |                          |            |

\*Symmetry transformations used to generate equivalent atoms:

#1:  $-x+2, -y+1, -z+1$ ; #2:  $-x+2, -y+1, -z+2$ ; #3:  $x-1, y, z$  for **4**.

**Table S5** Selected bond distances (Å) and angles (deg) of complex **6**\*

| Bond Distances           |           |                          |           |                          |           |
|--------------------------|-----------|--------------------------|-----------|--------------------------|-----------|
| Eu1–O3 <sup>#1</sup>     | 2.357(2)  | Eu–O6 <sup>#1</sup>      | 2.386(2)  | Eu–O4 <sup>#2</sup>      | 2.423(2)  |
| Eu1–O5                   | 2.443(2)  | Eu–O1W                   | 2.462(2)  | Eu–O2 <sup>#1</sup>      | 2.482(2)  |
| Eu1–O2                   | 2.488(2)  | Eu–O2W                   | 2.558(3)  | Eu–O1                    | 2.563(2)  |
| Bond Angles              |           |                          |           |                          |           |
| O3 <sup>#1</sup> –Eu–O5  | 78.77(9)  | O6 <sup>#1</sup> –Eu–O5  | 134.70(8) | O4 <sup>#2</sup> –Eu–O5  | 77.76(8)  |
| O3 <sup>#1</sup> –Eu–O1W | 71.13(9)  | O6 <sup>#1</sup> –Eu–O1W | 69.26(8)  | O4 <sup>#2</sup> –Eu–O1W | 80.33(8)  |
| O5–Eu–O1W                | 145.92(8) | O5–Eu–O2 <sup>#1</sup>   | 67.43(8)  | O1W–Eu–O2 <sup>#1</sup>  | 115.49(8) |
| O3 <sup>#1</sup> –Eu–O2  | 144.82(8) | O6 <sup>#1</sup> –Eu–O2  | 74.84(8)  | O4 <sup>#2</sup> –Eu–O2  | 123.66(8) |
| O5–Eu–O2                 | 79.11(8)  | O1W–Eu–O2                | 134.96(8) | O2 <sup>#1</sup> –Eu–O2  | 74.91(9)  |
| O3 <sup>#1</sup> –Eu–O2W | 136.47(9) | O6 <sup>#1</sup> –Eu–O2W | 70.88(9)  | O4 <sup>#2</sup> –Eu–O2W | 86.59(9)  |
| O5–Eu1–O2W               | 136.96(9) | O1W–Eu–O2W               | 66.38(9)  | O2 <sup>#1</sup> –Eu–O2W | 136.62(8) |
| O2–Eu1–O2W               | 76.90(8)  | O3 <sup>#1</sup> –Eu–O1  | 140.13(8) | O6 <sup>#1</sup> –Eu–O1  | 116.77(8) |
| O4 <sup>#2</sup> –Eu1–O1 | 72.42(7)  | O5–Eu–O1                 | 70.04(9)  | O1W–Eu–O1                | 126.67(9) |
| O2 <sup>#1</sup> –Eu1–O1 | 115.85(8) | O2–Eu–O1                 | 51.45(7)  | O2W–Eu–O1                | 67.03(9)  |

\*Symmetry transformations used to generate equivalent atoms:

#1  $-x+1/2, -y+1/2, -z+1$  #2  $x, -y+1, z-1/2$  for **6**.

**Table S6** Selected bond distances (Å) and angles (deg) of complex **7**\*

| Bond Distances           |           |                          |           |                          |           |
|--------------------------|-----------|--------------------------|-----------|--------------------------|-----------|
| Dy–O1 <sup>#1</sup>      | 2.316(2)  | Dy–O5 <sup>#2</sup>      | 2.357(2)  | Dy–O2 <sup>#3</sup>      | 2.379(2)  |
| Dy–O6                    | 2.398(2)  | Dy–O1W                   | 2.427(2)  | Dy–O4                    | 2.442(2)  |
| Dy–O4 <sup>#2</sup>      | 2.451(2)  | Dy–O2W                   | 2.506(3)  | Dy–O3                    | 2.537(2)  |
| Bond Angles              |           |                          |           |                          |           |
| O1 <sup>#1</sup> –Dy–O6  | 78.29(8)  | O5 <sup>#2</sup> –Dy–O6  | 135.29(8) | O2 <sup>#3</sup> –Dy–O6  | 77.83(8)  |
| O1 <sup>#1</sup> –Dy–O1W | 70.72(8)  | O5 <sup>#2</sup> –Dy–O1W | 69.19(8)  | O2 <sup>#3</sup> –Dy–O1W | 80.00(8)  |
| O6–Dy–O1W                | 145.08(8) | O1 <sup>#1</sup> –Dy–O4  | 144.51(8) | O5 <sup>#2</sup> –Dy–O4  | 74.97(8)  |
| O2 <sup>#3</sup> –Dy–O4  | 123.82(7) | O6–Dy–O4                 | 79.32(7)  | O1W–Dy–O4                | 135.61(8) |
| O6–Dy–O4 <sup>#2</sup>   | 67.75(8)  | O1W–Dy–O4 <sup>#2</sup>  | 115.21(8) | O4–Dy–O4 <sup>#2</sup>   | 74.37(8)  |
| O1 <sup>#1</sup> –Dy–O2W | 136.04(9) | O5 <sup>#2</sup> –Dy–O2W | 70.89(9)  | O2 <sup>#3</sup> –Dy–O2W | 85.76(9)  |
| O6–Dy–O2W                | 137.28(9) | O1W–Dy–O2W               | 66.48(9)  | O4–Dy–O2W                | 77.75(8)  |
| O4 <sup>#2</sup> –Dy–O2W | 136.78(8) | O1 <sup>#1</sup> –Dy–O3  | 139.54(8) | O5 <sup>#2</sup> –Dy–O3  | 117.17(8) |
| O2 <sup>#3</sup> –Dy–O3  | 71.93(8)  | O6–Dy–O3                 | 70.09(8)  | O1W–Dy–O3                | 126.94(8) |
| O4–Dy–O3                 | 52.09(7)  | O4 <sup>#2</sup> –Dy–O3  | 116.01(8) | O2W–Dy–O3                | 67.35(9)  |

\*Symmetry transformations used to generate equivalent atoms:

#1:  $x-1/2, y-1/2, z$ ; #2:  $-x+1/2, -y+3/2, -z$ ; #3:  $-x+1, y, -z+1/2$  for **7**.

**Table S7** Selected Bond distances (Å) and Angles (deg) of Complex **8**\*

| Bond Distances           |            |                          |            |                          |            |
|--------------------------|------------|--------------------------|------------|--------------------------|------------|
| Ho–O4 <sup>#1</sup>      | 2.303(3)   | Ho–O5 <sup>#1</sup>      | 2.349(3)   | Ho–O3 <sup>#3</sup>      | 2.367(3)   |
| Ho–O6                    | 2.383(3)   | Ho–O1W                   | 2.416(3)   | Ho1–O2                   | 2.430(3)   |
| Ho–O2 <sup>#1</sup>      | 2.440(3)   | Ho–O2W                   | 2.501(4)   | Ho1–O1                   | 2.537(3)   |
| Bond Angles              |            |                          |            |                          |            |
| O4 <sup>#1</sup> –Ho–O6  | 78.30(10)  | O5 <sup>#1</sup> –Ho–O6  | 135.57(10) | O3 <sup>#3</sup> –Ho–O6  | 77.80(9)   |
| O4 <sup>#1</sup> –Ho–O1W | 71.00(11)  | O5 <sup>#1</sup> –Ho–O1W | 69.29(10)  | O3 <sup>#3</sup> –Ho–O1W | 79.69(10)  |
| O6–Ho–O1W                | 145.13(10) | O4 <sup>#1</sup> –Ho–O2  | 144.68(9)  | O5 <sup>#1</sup> –Ho–O2  | 75.04(9)   |
| O3 <sup>#3</sup> –Ho–O2  | 123.65(9)  | O6–Ho–O2                 | 79.36(9)   | O1W–Ho–O2                | 135.50(10) |
| O6–Ho–O2 <sup>#1</sup>   | 67.83(9)   | O1W–Ho–O2 <sup>#1</sup>  | 115.82(10) | O2–Ho–O2 <sup>#1</sup>   | 74.25(10)  |
| O4 <sup>#1</sup> –Ho–O2W | 136.24(10) | O5 <sup>#1</sup> –Ho–O2W | 70.82(12)  | O3 <sup>#3</sup> –Ho–O2W | 85.61(12)  |
| O6–Ho–O2W                | 136.94(11) | O1W–Ho–O2W               | 66.40(11)  | O2–Ho–O2W                | 77.47(10)  |
| O2 <sup>#1</sup> –Ho–O2W | 136.66(11) | O4 <sup>#1</sup> –Ho–O1  | 139.27(10) | O5 <sup>#1</sup> –Ho–O1  | 117.27(10) |
| O3 <sup>#3</sup> –Ho–O1  | 71.63(9)   | O6–Ho–O1                 | 69.95(10)  | O1W–Ho–O1                | 126.43(10) |
| O2–Ho–O1                 | 52.20(9)   | O2 <sup>#1</sup> –Ho–O1  | 115.93(9)  | O2W–Ho–O1                | 67.14(12)  |

\*Symmetry transformations used to generate equivalent atoms:

#1:  $-x+1/2, -y+3/2, -z$ ; #3:  $x, -y+1, z+1/2$  for **8**.



**Table S8** Selected bond distances (Å) and angles (deg) of complex **10**\*

| Bond Distances           |            |                          |            |                          |            |
|--------------------------|------------|--------------------------|------------|--------------------------|------------|
| Eu–O6 <sup>#1</sup>      | 2.339(3)   | Eu–O2 <sup>#1</sup>      | 2.383(3)   | Eu–O3 <sup>#2</sup>      | 2.403(2)   |
| Eu–O5                    | 2.410(3)   | Eu–O1W                   | 2.411(4)   | Eu–O1                    | 2.471(3)   |
| Eu–O3                    | 2.522(3)   | Eu–O2                    | 2.593(3)   | Eu–O4                    | 2.616(3)   |
| Bond Angles              |            |                          |            |                          |            |
| O6 <sup>#1</sup> –Eu–O1W | 74.38(12)  | O2 <sup>#1</sup> –Eu–O1W | 131.96(12) | O3 <sup>#2</sup> –Eu–O1W | 77.56(11)  |
| O6 <sup>#1</sup> –Eu–O5  | 142.66(10) | O2 <sup>#1</sup> –Eu–O5  | 70.44(10)  | O3 <sup>#2</sup> –Eu–O5  | 77.85(10)  |
| O5–Eu–O1W                | 137.43(10) | O6 <sup>#1</sup> –Eu–O1  | 134.45(10) | O2 <sup>#1</sup> –Eu–O1  | 140.98(10) |
| O3 <sup>#2</sup> –Eu–O1  | 119.84(8)  | O1W–Eu–O1                | 86.66(12)  | O5–Eu–O1                 | 76.29(10)  |
| O6 <sup>#1</sup> –Eu–O3  | 90.82(9)   | O2 <sup>#1</sup> –Eu–O3  | 71.59(9)   | O3 <sup>#2</sup> –Eu–O3  | 139.25(4)  |
| O1W–Eu–O3                | 142.47(11) | O5–Eu–O3                 | 72.53(9)   | O1–Eu–O3                 | 79.52(9)   |
| O6 <sup>#1</sup> –Eu–O2  | 138.20(9)  | O2 <sup>#1</sup> –Eu–O2  | 133.07(6)  | O3 <sup>#2</sup> –Eu–O2  | 70.03(8)   |
| O1W–Eu–O2                | 64.24(11)  | O5–Eu–O2                 | 74.89(9)   | O1–Eu–O2                 | 51.11(8)   |
| O3–Eu–O2                 | 125.76(9)  | O6 <sup>#1</sup> –Eu–O4  | 72.58(10)  | O2 <sup>#1</sup> –Eu–O4  | 110.15(9)  |
| O3 <sup>#2</sup> –Eu–O4  | 166.52(9)  | O1W–Eu–O4                | 91.78(11)  | O5–Eu–O4                 | 115.60(9)  |
| O1–Eu–O4                 | 66.94(9)   | O3–Eu–O4                 | 50.69(8)   | O2–Eu–O4                 | 112.93(8)  |

\*Symmetry transformations used to generate equivalent atoms:

#1:  $-x+1/2, y-1/2, -z+1/2$ ; #2  $-x+1/2, y+1/2, -z+1/2$  for **10**.

**Table S9** Selected bond distances (Å) and angles (deg) of complex **11**\*

| Bond Distances           |            |                          |            |                          |            |
|--------------------------|------------|--------------------------|------------|--------------------------|------------|
| Dy–O1                    | 2.561(3)   | Dy–O2                    | 2.434(3)   | Dy–O3                    | 2.608(3)   |
| Dy–O4                    | 2.475(3)   | Dy–O5                    | 2.369(3)   | Dy–O1W                   | 2.380(4)   |
| Dy–O4 <sup>#1</sup>      | 2.366(2)   | Dy–O1 <sup>#2</sup>      | 2.348(3)   | Dy–O6 <sup>#2</sup>      | 2.310(3)   |
| Bond Angles              |            |                          |            |                          |            |
| O6 <sup>#2</sup> –Dy–O5  | 143.32(10) | O1 <sup>#2</sup> –Dy–O5  | 70.90(10)  | O4 <sup>#1</sup> –Dy–O5  | 78.29(10)  |
| O6 <sup>#2</sup> –Dy–O1W | 73.44(13)  | O1 <sup>#2</sup> –Dy–O1W | 132.49(12) | O4 <sup>#1</sup> –Dy–O1W | 78.19(13)  |
| O5–Dy–O1W                | 138.18(13) | O6 <sup>#2</sup> –Dy–O2  | 133.87(10) | O1 <sup>#2</sup> –Dy–O2  | 141.01(10) |
| O4 <sup>#1</sup> –Dy–O2  | 119.96(9)  | O5–Dy–O2                 | 76.30(10)  | O1W–Dy–O2                | 86.31(13)  |
| O6 <sup>#2</sup> –Dy–O4  | 90.91(9)   | O1 <sup>#2</sup> –Dy–O4  | 71.39(9)   | O4 <sup>#1</sup> –Dy–O4  | 140.00(4)  |
| O5–Dy–O4                 | 72.83(9)   | O1W–Dy–O4                | 141.02(13) | O2–Dy–O4                 | 79.33(9)   |
| O6 <sup>#2</sup> –Dy–O1  | 137.06(10) | O1 <sup>#2</sup> –Dy–O1  | 133.84(7)  | O4 <sup>#1</sup> –Dy–O1  | 69.58(8)   |
| O5–Dy–O1                 | 75.40(9)   | O1W–Dy–O1                | 64.14(12)  | O2–Dy–O1                 | 51.71(9)   |
| O4–Dy–O1                 | 126.46(9)  | O6 <sup>#2</sup> –Dy–O3  | 72.31(10)  | O1 <sup>#2</sup> –Dy–O3  | 110.39(9)  |
| O4 <sup>#1</sup> –Dy–O3  | 165.49(9)  | O5–Dy–O3                 | 116.22(9)  | O1W–Dy–O3                | 89.73(13)  |
| O2–Dy–O3                 | 66.48(9)   | O4–Dy–O3                 | 51.31(8)   | O1–Dy–O3                 | 112.43(9)  |

\*Symmetry codes follow: #1:  $-x+3/2, y-1/2, -z+1/2$ ; #2:  $-x+3/2, y+1/2, -z+1/2$  for **11**.

**Table S10** Selected Bond distances (Å) and Angles (deg) of Complex **12**\*

| Bond Distances                        |            |                                       |            |                                       |            |
|---------------------------------------|------------|---------------------------------------|------------|---------------------------------------|------------|
| Er–O1                                 | 2.447(3)   | Er–O2                                 | 2.600(3)   | Er–O3 <sup>#3</sup>                   | 2.547(3)   |
| Er–O4 <sup>#3</sup>                   | 2.413(3)   | Er–O1W                                | 2.343(3)   | Er–O6                                 | 2.348(3)   |
| Er–O1 <sup>#2</sup>                   | 2.345(3)   | Er–O3 <sup>#2</sup>                   | 2.323(3)   | Er–O5 <sup>#1</sup>                   | 2.297(3)   |
| Bond Angles                           |            |                                       |            |                                       |            |
| O5 <sup>#1</sup> –Er–O6               | 143.30(11) | O3 <sup>#2</sup> –Er–O6               | 71.04(11)  | O1 <sup>#2</sup> –Er–O6               | 78.27(10)  |
| O5 <sup>#1</sup> –Er–O1W              | 72.86(12)  | O3 <sup>#2</sup> –Er–O1W              | 132.57(12) | O1W–Er–O1 <sup>#2</sup>               | 78.78(11)  |
| O1W–Er–O6                             | 138.87(11) | O5 <sup>#1</sup> –Er–O4 <sup>#3</sup> | 133.92(11) | O3 <sup>#2</sup> –Er–O4 <sup>#3</sup> | 141.00(11) |
| O1 <sup>#2</sup> –Er–O4 <sup>#3</sup> | 119.97(10) | O6–Er–O4 <sup>#3</sup>                | 76.36(11)  | O1W–Er–O4 <sup>#3</sup>               | 86.33(12)  |
| O5 <sup>#1</sup> –Er–O1               | 90.82(10)  | O3 <sup>#2</sup> –Er–O1               | 71.46(10)  | O1 <sup>#2</sup> –Er–O1               | 140.46(5)  |
| O6–Er–O1                              | 73.23(10)  | O1W–Er–O1                             | 139.89(11) | O4 <sup>#3</sup> –Er–O1               | 79.17(10)  |
| O5 <sup>#1</sup> –Er–O3 <sup>#3</sup> | 136.58(10) | O3 <sup>#2</sup> –Er–O3 <sup>#3</sup> | 134.21(7)  | O1 <sup>#2</sup> –Er–O3 <sup>#3</sup> | 69.33(9)   |
| O6–Er–O3 <sup>#3</sup>                | 75.74(10)  | O1W–Er–O3 <sup>#3</sup>               | 64.35(11)  | O4 <sup>#3</sup> –Er–O3 <sup>#3</sup> | 52.04(9)   |
| O1–Er–O3 <sup>#3</sup>                | 126.89(10) | O5 <sup>#1</sup> –Er–O2               | 72.33(11)  | O3 <sup>#2</sup> –Er–O2               | 110.69(10) |
| O1 <sup>#2</sup> –Er–O2               | 164.90(10) | O6–Er–O2                              | 116.81(10) | O1W–Er–O2                             | 88.29(11)  |
| O4 <sup>#3</sup> –Er–O2               | 66.26(10)  | O1–Er–O2                              | 51.63(9)   | O3 <sup>#3</sup> –Er–O2               | 112.07(9)  |

\*Symmetry codes follow: #1  $-x+1/2, y-1/2, -z+1/2$ ; #2  $-x+1/2, y+1/2, -z+1/2$ ; #3  $x, y+1, z$  for **12**.

**Table S11** The comparison of the bond distance of rigid bta and glutarate ligands for Ln–bta–glu complexes

| Complexes | Bta       | Glutarate |
|-----------|-----------|-----------|
|           | Ln–O (av) | Ln–O (av) |
| <b>6</b>  | 2.458(2)  | 2.415(2)  |
| <b>5</b>  | 2.438(3)  | 2.387(3)  |
| <b>7</b>  | 2.419(2)  | 2.378(2)  |
| <b>8</b>  | 2.415(3)  | 2.366(3)  |

**Table S12** The comparison of the bond distance of rigid bta and glutarate ligands for Ln–bta–ad complexes

| Complexes | Bta       | Adipate   |
|-----------|-----------|-----------|
|           | Ln–O (av) | Ln–O (av) |
| <b>10</b> | 2.498(2)  | 2.375(3)  |
| <b>9</b>  | 2.475(2)  | 2.351(3)  |
| <b>11</b> | 2.465(3)  | 2.340(3)  |
| <b>12</b> | 2.446(3)  | 2.323(3)  |

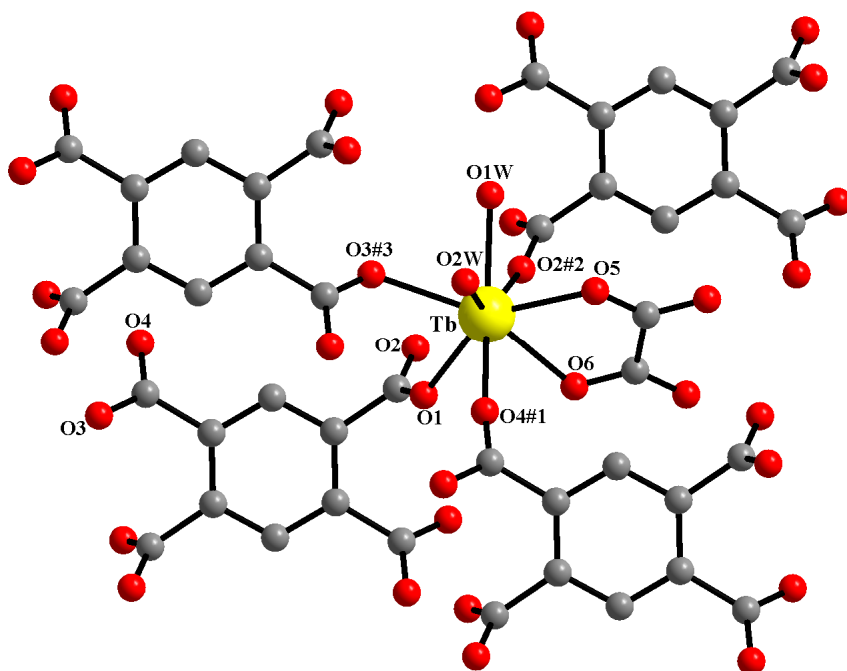

**Figure S1** The coordination environment of Tb in complex **2**. (Symmetry codes follow: #1:  $x, y-1, z$ ; #2:  $-x+1, -y+1, -z+1$ ; #3:  $-x+2, -y+2, -z+2$ )

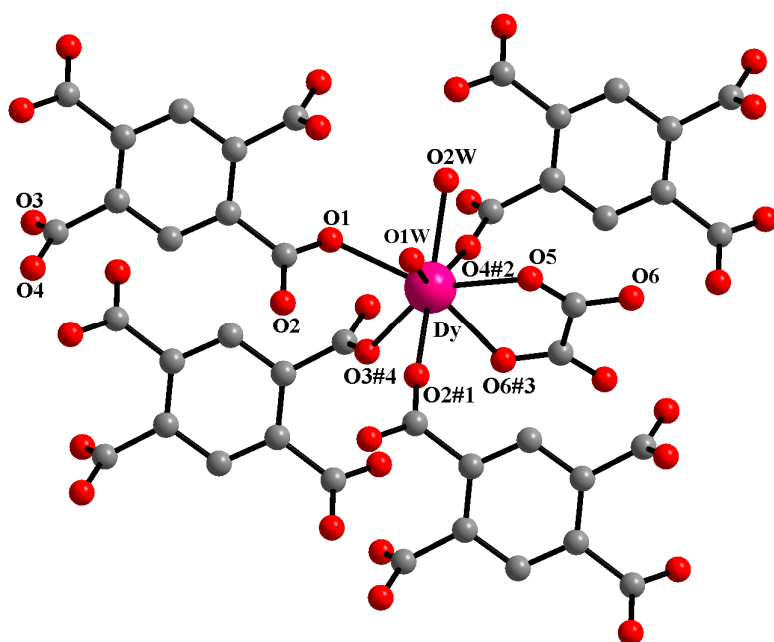

**Figure S2** The coordination environment of Dy in complex **3**. (Symmetry codes follow: #1  $-x+1, -y+1, -z+1$ ; #2  $x-1, y-1, z-1$ ; #3  $-x, -y, -z$ ; #4  $-x+1, -y+2, -z+1$ )

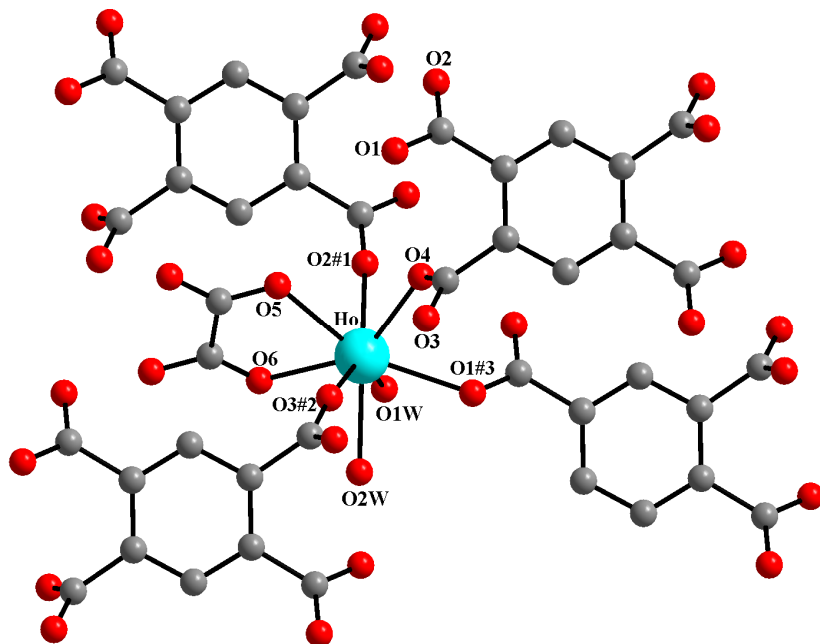

**Figure S3** The coordination environment of Ho in complex 4. (Symmetry codes follow: #1:  $-x+2, -y+1, -z+1$ ; #2:  $-x+2, -y+1, -z+2$ ; #3:  $x-1, y, z$ )

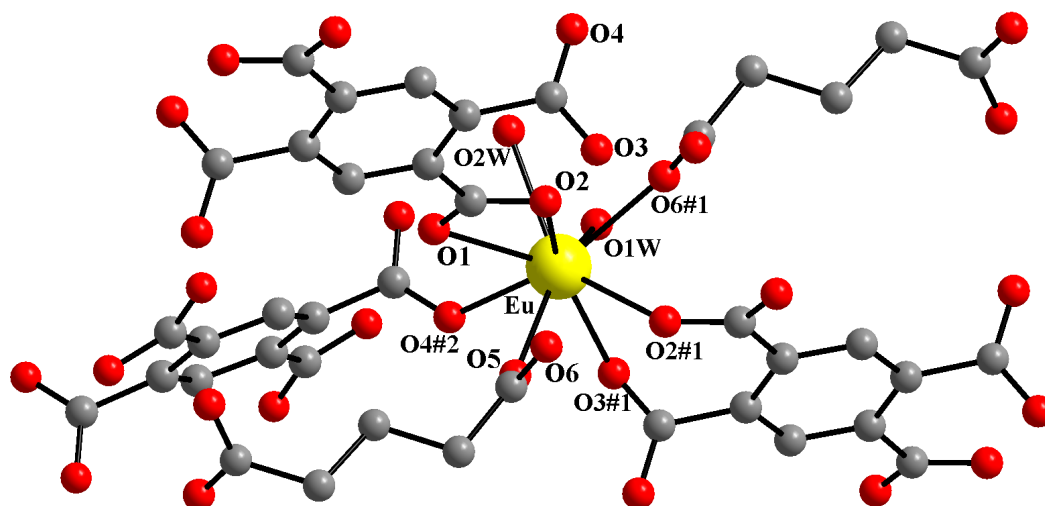

**Figure S4** The coordination environment of Eu in complex 6. (Symmetry codes follow: #1  $-x+1/2, -y+1/2, -z+1$ ; #2  $x, -y+1, z-1/2$ )

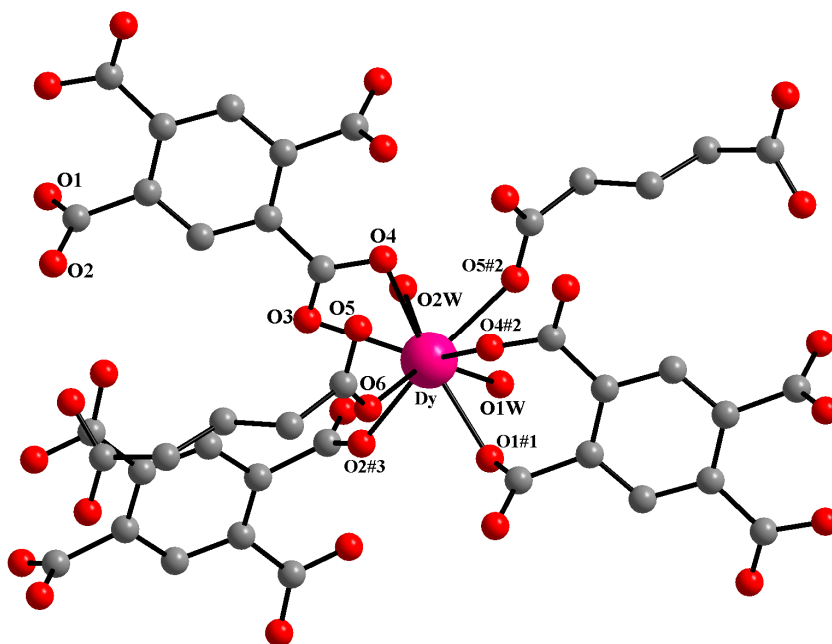

**Figure S5** The coordination environment of Dy in complex **7**. (Symmetry codes follow: #1:

$x-1/2, y-1/2, z$ ; #2:  $-x+1/2, -y+3/2, -z$ ; #3:  $-x+1, y, -z+1/2$ )

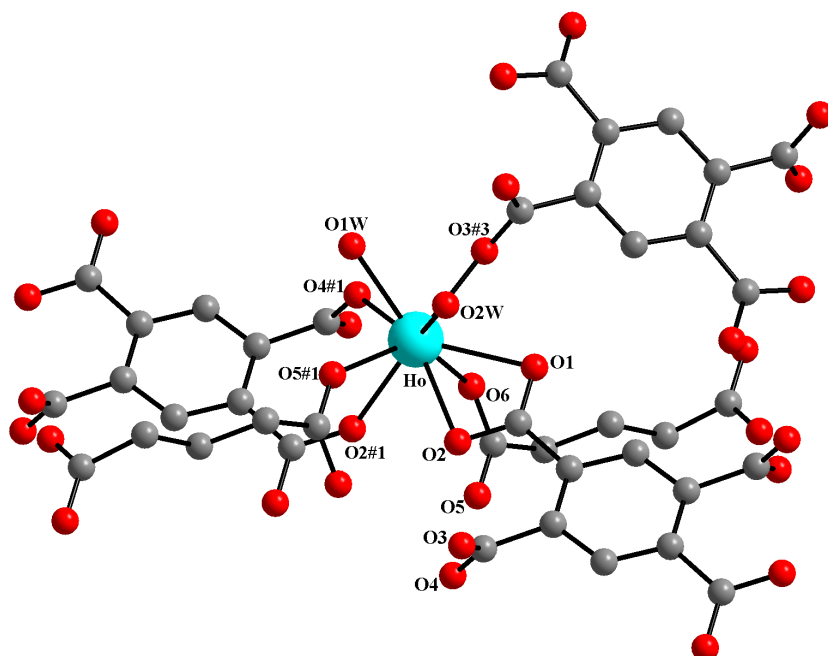

**Figure S6** The coordination environment of Ho in complex **8**. (Symmetry codes

follow: #1:  $-x+1/2, -y+3/2, -z$ ; #3:  $x, -y+1, z+1/2$ )

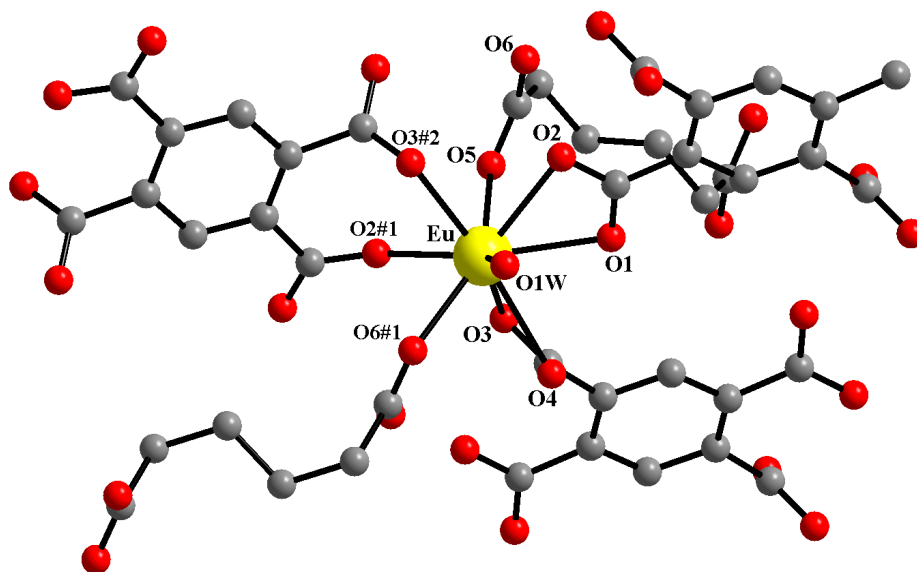

**Figure S7** The coordination environment of Eu in complex **10**. (Symmetry codes follow: #1:  $-x+1/2, y-1/2, -z+1/2$ ; #2:  $-x+1/2, y+1/2, -z+1/2$ )

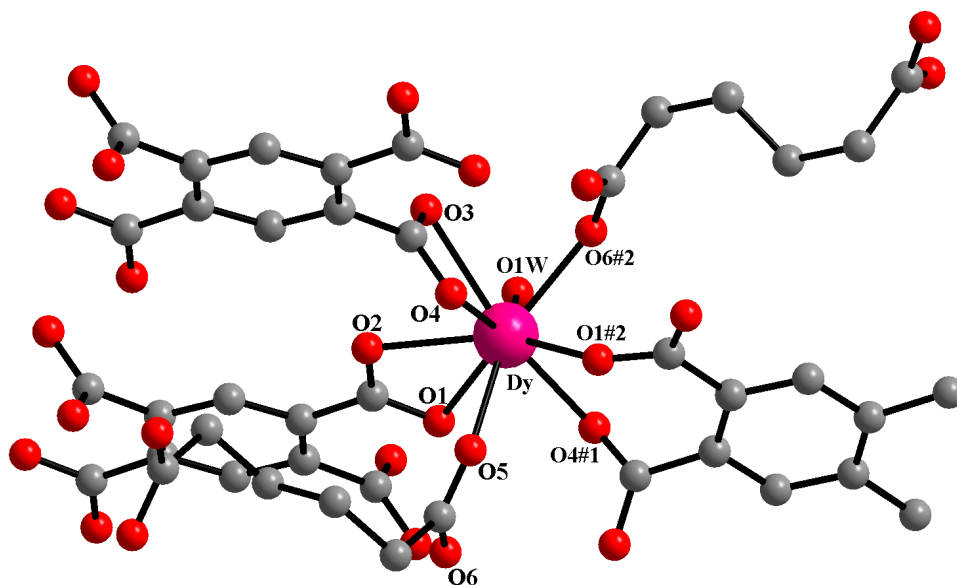

**Figure S8** The coordination environment of Dy in complex **11**. (Symmetry codes follow: #1:  $-x+3/2, y-1/2, -z+1/2$ ; #2:  $-x+3/2, y+1/2, -z+1/2$ )

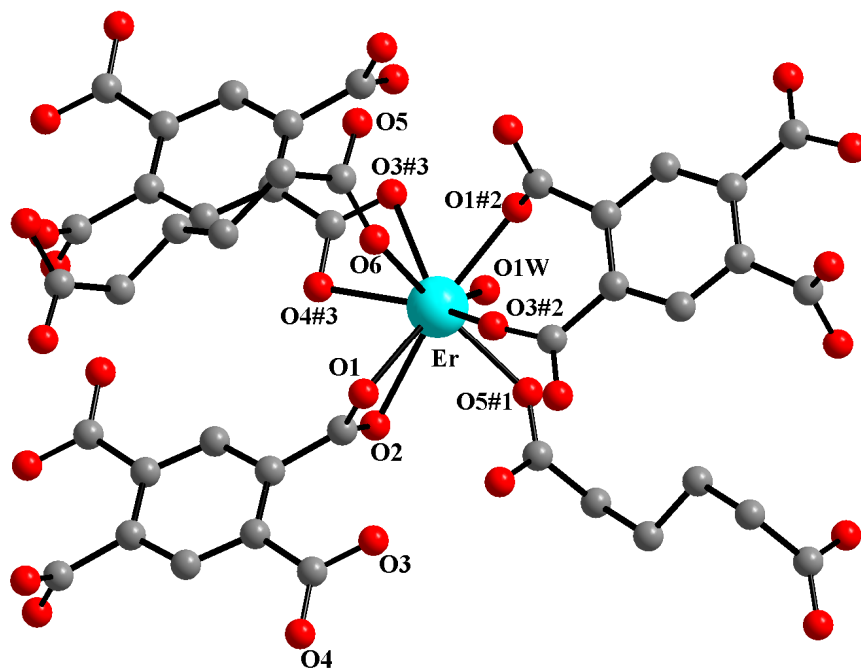

**Figure S9** The coordination environment of Er in complex **12**. (Symmetry codes follow: #1

$-x+1/2, y-1/2, -z+1/2$  ; #2  $-x+1/2, y+1/2, -z+1/2$  ; #3  $x, y+1, z$ .)

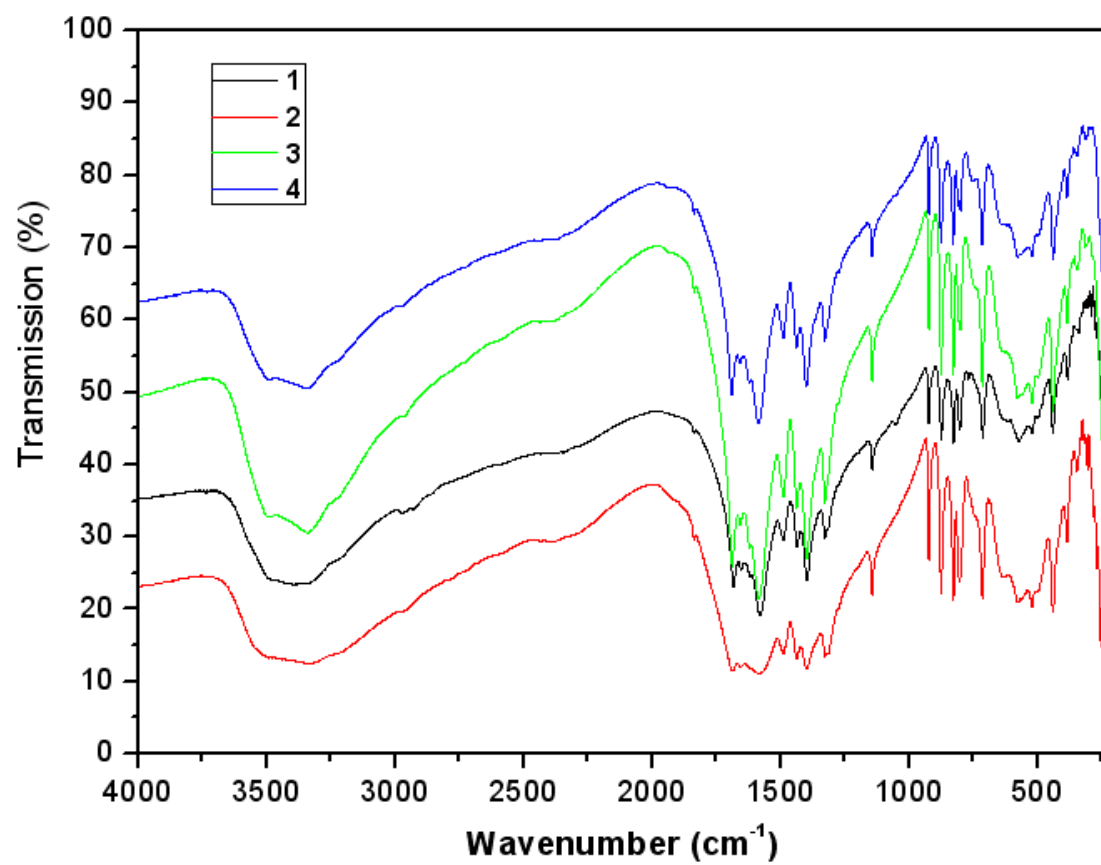

**Figure S10** The infrared spectra for complexes 1–4.



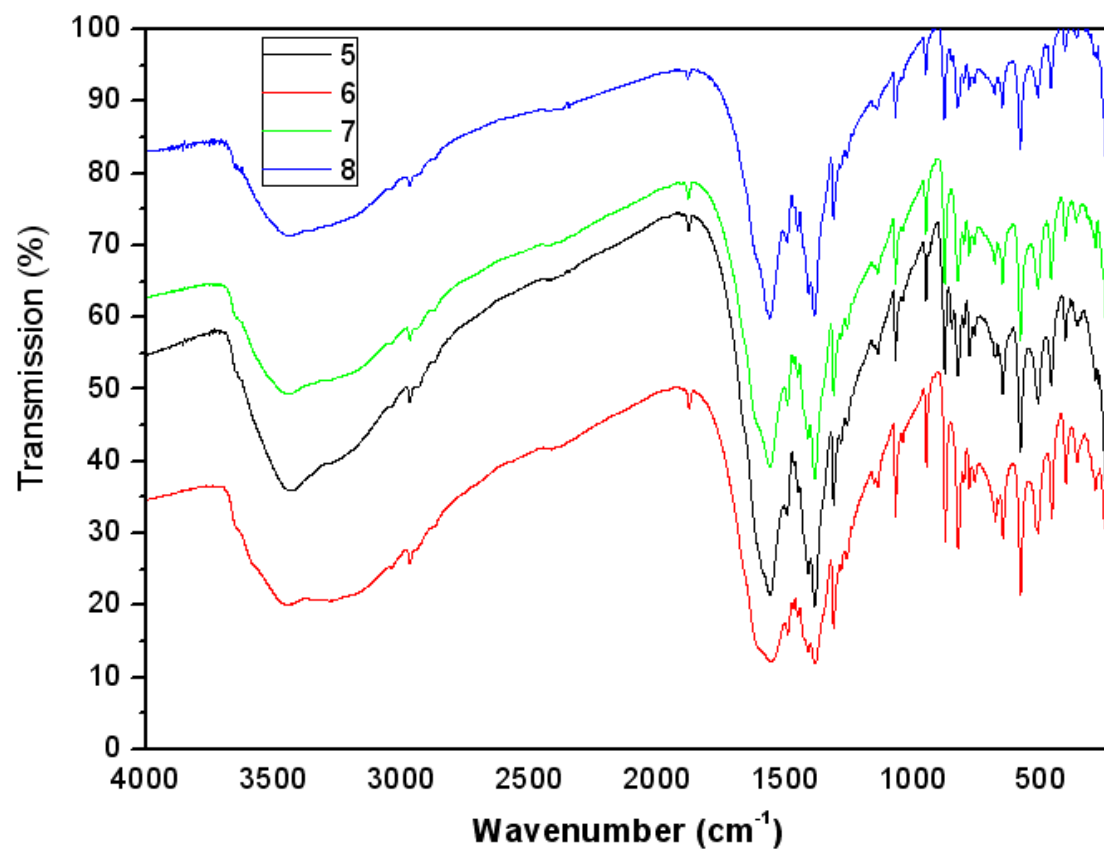

**Figure S11** The infrared spectra for complexes 5–8.

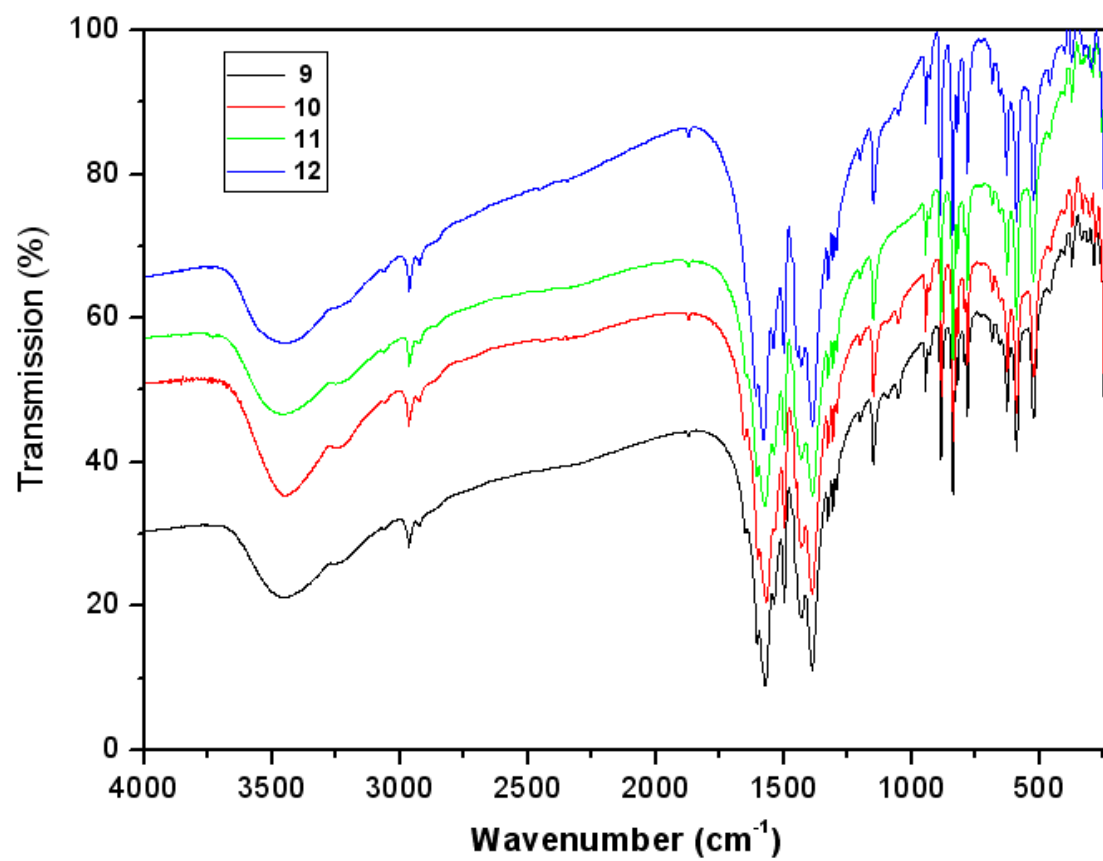

**Figure S12** The infrared spectra for complexes 9–12.
